# Supplementary material for: Cytosolic nucleic acid sensors of the innate immune system promote liver regeneration after partial hepatectomy
Source: PubMed Central journal article supplement (PMC6095902; doi:10.1038/s41598-018-29924-3), 2018-08-16
Supplement: 41598_2018_29924_MOESM1_ESM.pdf [file 41598_2018_29924_MOESM1_ESM.pdf]

# **Cytosolic nucleic acid sensors of the innate immune system promote liver regeneration after partial hepatectomy**

**Sarah Schulze <sup>1</sup>, Christian Stöß <sup>1</sup>, Miao Lu <sup>1</sup>, Baocai Wang <sup>1</sup>, Melanie Laschinger <sup>1</sup>, Katja Steiger <sup>2</sup>, Felicitas Altmayr <sup>1</sup>, Helmut Friess <sup>1</sup>, Daniel Hartmann <sup>1</sup>, Bernhard Holzmann <sup>1 + \*</sup>, Norbert Hüser <sup>1 +</sup>**

<sup>1</sup> Technical University of Munich, School of Medicine, Department of Surgery, Ismaninger Str. 22, 81675 Munich, Germany

<sup>2</sup> Technical University of Munich, School of Medicine, Comparative Experimental Pathology, Institute of Pathology, Trogerstr. 18, 81675 Munich, Germany

\* Corresponding author: [bernhard.holzmann@tum.de](mailto:bernhard.holzmann@tum.de)

+ These authors contributed equally to this study

## Supplemental Figure S1

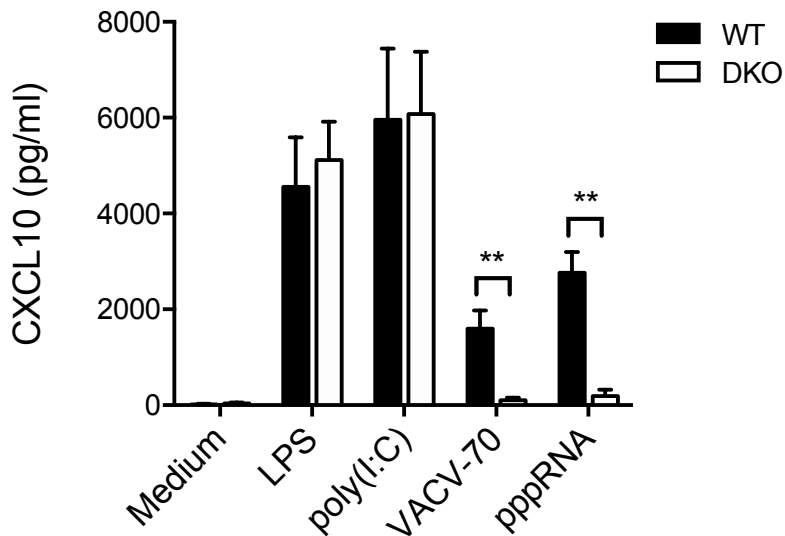

### Legend:

Bone marrow-derived macrophages from wildtype and DKO mice were generated by culture of bone marrow cells in RPMI1640 medium containing 10 % fetal calf serum and 15 % L cell-conditioned medium as a source of M-CSF for at least 7 d.

For controls, cells were used unstimulated (medium) or were stimulated with 10 ng/ml of the TLR4 agonist *E.coli* LPS (Sigma-Aldrich Chemie GmbH, Taufkirchen, Germany) or 50 µg/ml of the TLR3 agonist polyI:C (Invivogen, Toulouse, France).

To stimulate cytosolic DNA sensors, macrophages were incubated with 3 µg/ml of the immunostimulatory DNA VACV-70 that was complexed with the transfection reagent LyoVec™ to facilitate its uptake (Invivogen, Toulouse, France).

To stimulate cytosolic RNA sensors, macrophages were incubated with 1 µg/ml 5'ppp-dsRNA that was complexed with the transfection reagent LyoVec™ to facilitate its uptake (Invivogen, Toulouse, France).

After 16 h of stimulation, CXCL10 levels were measured in culture supernatants using the Mouse CXCL10 Quantikine ELISA Kit (R&D Systems, Minneapolis, USA) according to manufacturer's instructions.

## Supplemental Figure S2

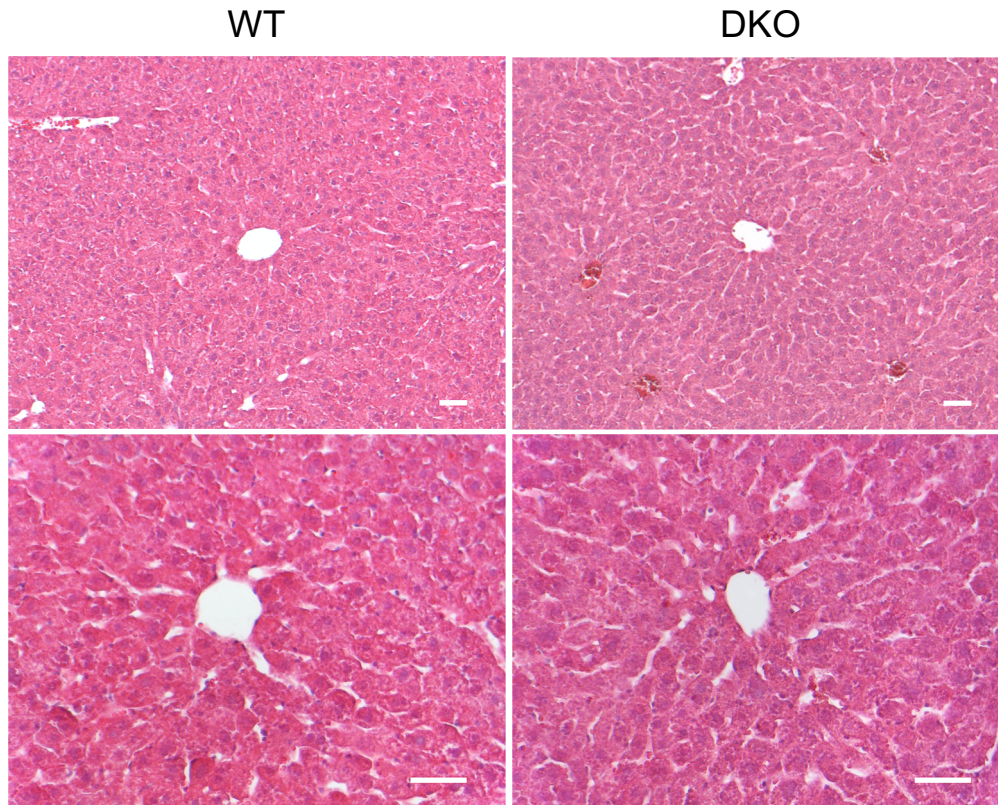

### Legend:

Liver sections of untreated wildtype and DKO mice (n=6) were stained with hematoxylin/eosin and mounted with Eukitt mounting medium (Merck, Darmstadt, Germany). Stained sections were imaged using an Axiolap microscope attached to an AxioCam MRc5 camera, an EC Plan-Neofluar 10x/0.3 NA and an Achromplan 20x/0.45 NA objective and analyzed using the Axiovision software (all Carl Zeiss Microscopy, Jena, Germany).

Representative images of wildtype and DKO mice are depicted. Scale bars indicate 50 $\mu$ m.

## Full length gels for Figure 2B

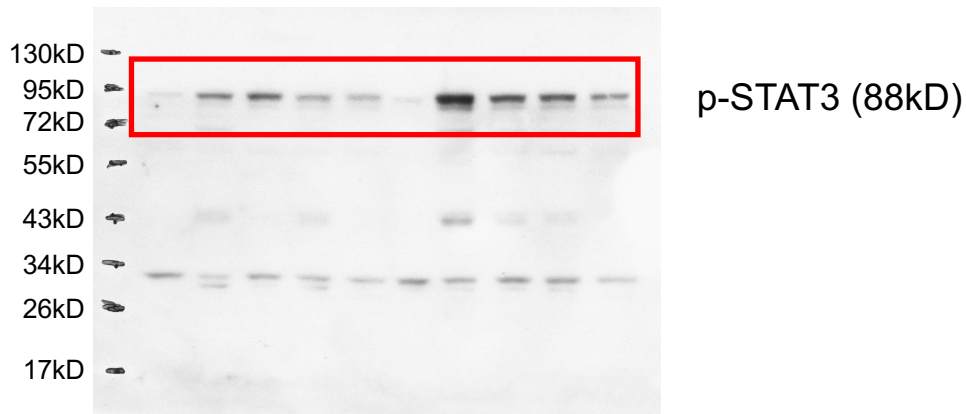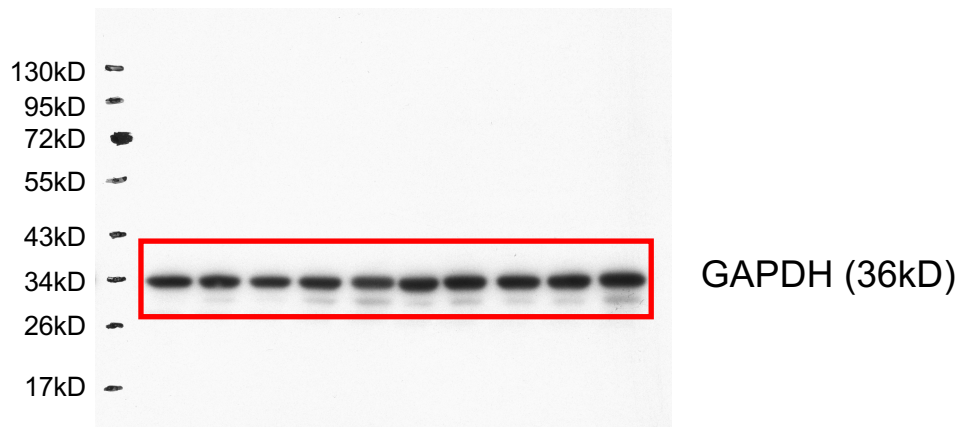

### Legend:

Areas of the gel shown in Figure 2B are marked in red.

The membrane was probed first with anti-p-STAT3 and subsequently with anti-GAPDH antibodies. Predicted molecular weights for p-STAT3 and GAPDH are indicated.

## Full length gels for Figure 2C

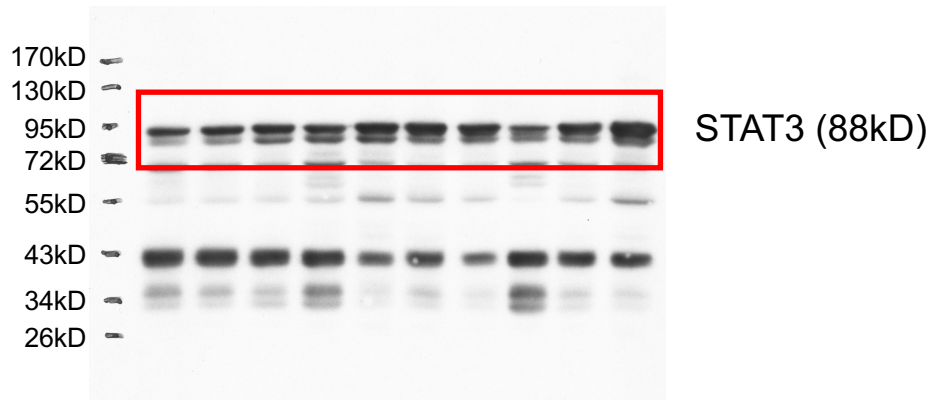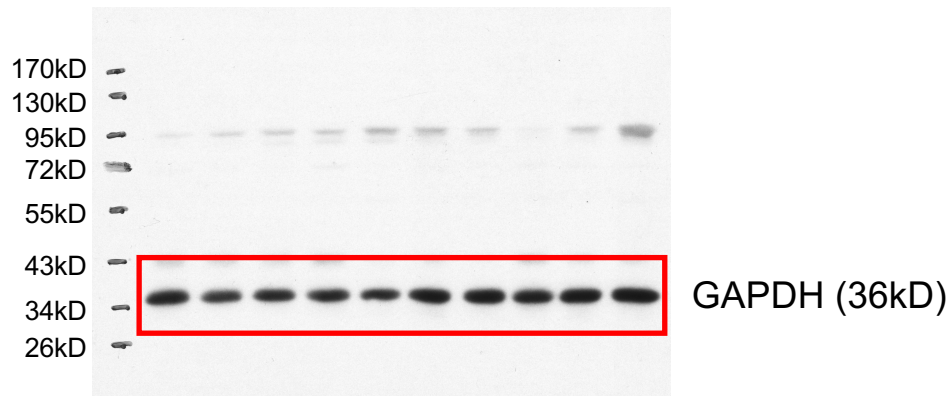

### Legend:

Areas of the gel shown in Figure 2C are marked in red.

The membrane was probed first with anti-STAT3 and subsequently with anti-GAPDH antibodies. Predicted molecular weights for STAT3 and GAPDH are indicated.

## Full length gels for Figure 4A (part 1)

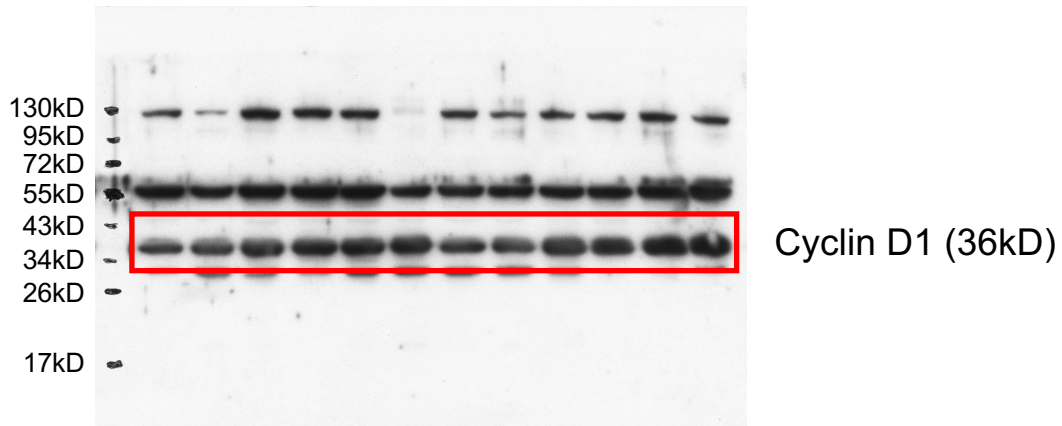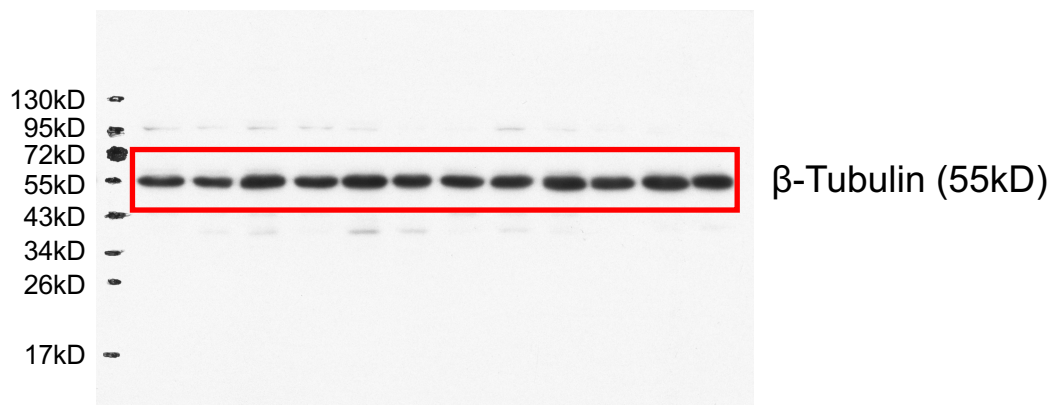

### Legend:

Areas of the gel shown in Figure 4A are marked in red.

The membrane was probed first with anti-cyclin D1 and subsequently with anti-Tubulin antibodies. Predicted molecular weights for cyclin D1 and  $\beta$ -tubulin are indicated.

## Full length gels for Figure 4A (part 2)

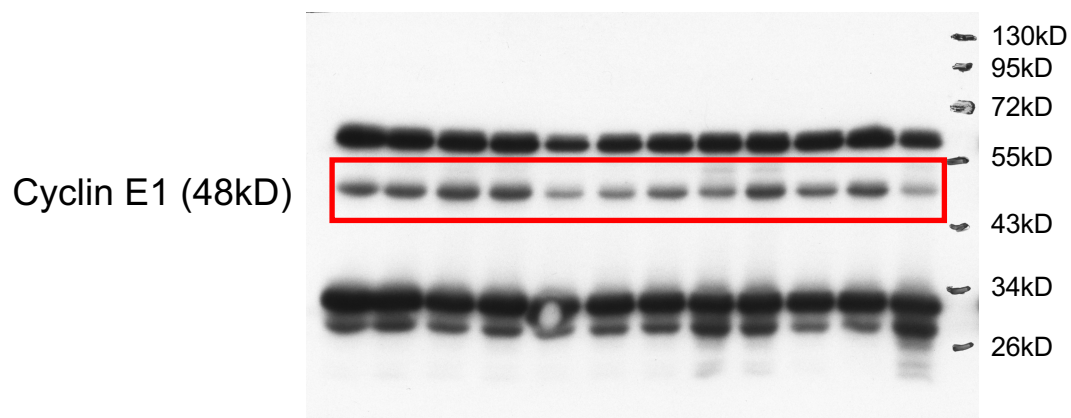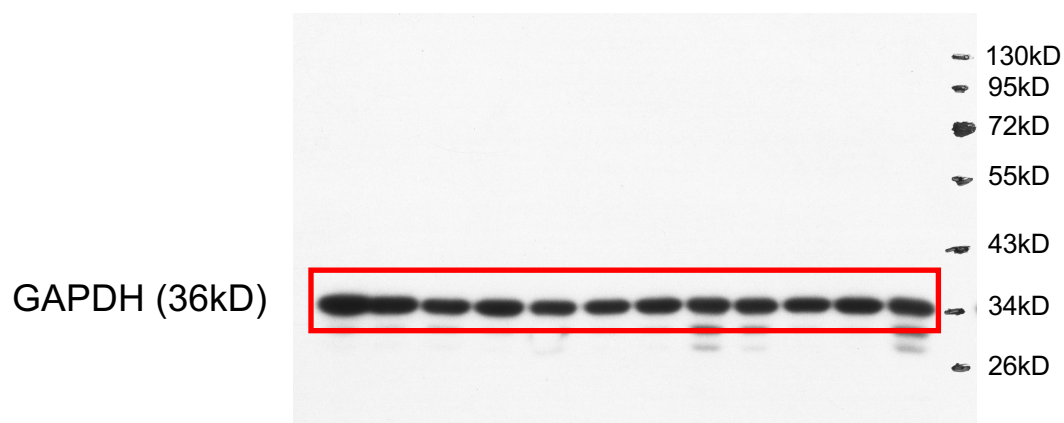

### Legend:

Areas of the gel shown in Figure 4A are marked in red.

The membrane was probed first with anti-GAPDH and subsequently with anti-cyclin E1 antibodies. Predicted molecular weights for cyclin E1 and GAPDH are indicated.

## Full length gels for Figure 4A (part 3)

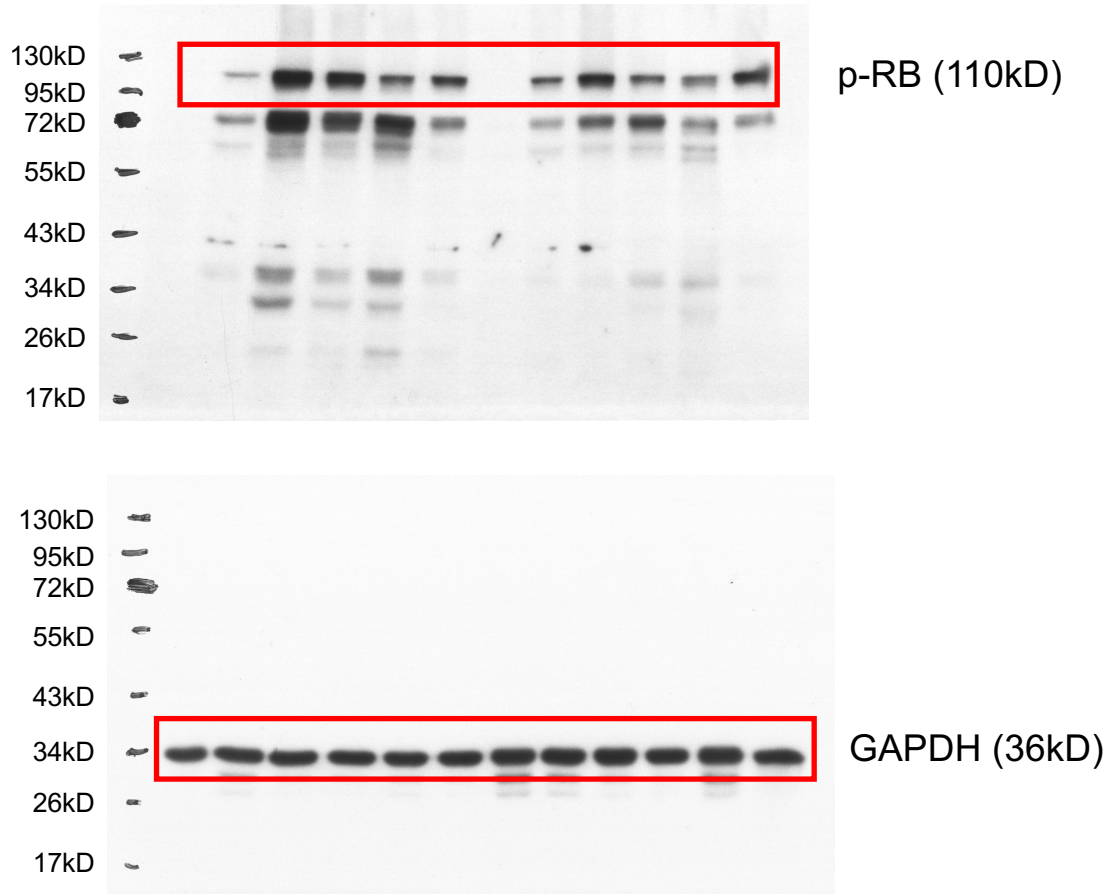

### Legend:

Areas of the gel shown in Figure 4A are marked in red.

The membrane was probed first with anti-p-RB and subsequently with GAPDH antibodies. Predicted molecular weights for p-RB and GAPDH are indicated.



## Full length gels for Figure 4A (part 4)

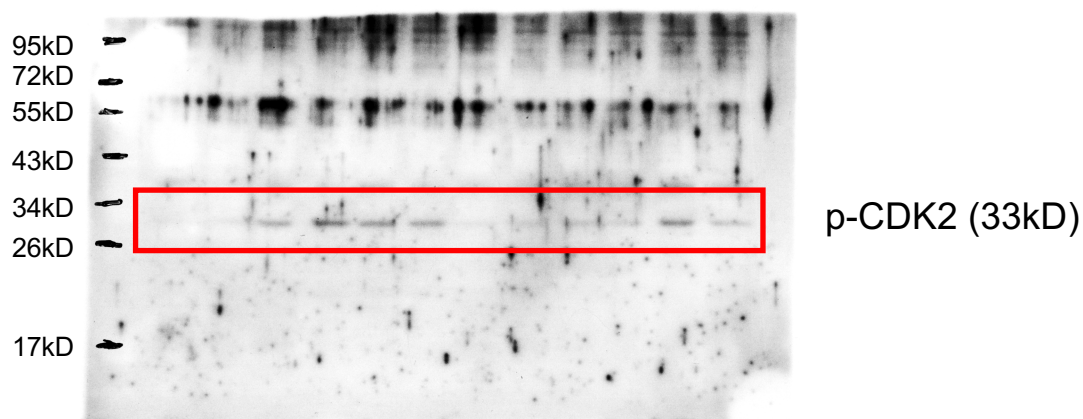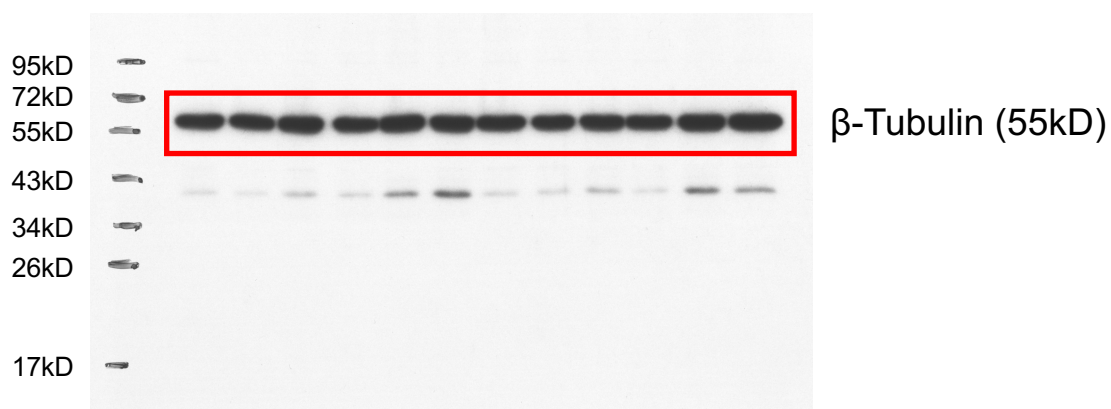

### Legend:

Areas of the gel shown in Figure 4A are marked in red.

The membrane was probed first with anti-p-CDK2 and subsequently with anti-Tubulin antibodies. Predicted molecular weights for p-CDK2 and  $\beta$ -tubulin are indicated.

## Full length gels for Figure 4A (part 5)

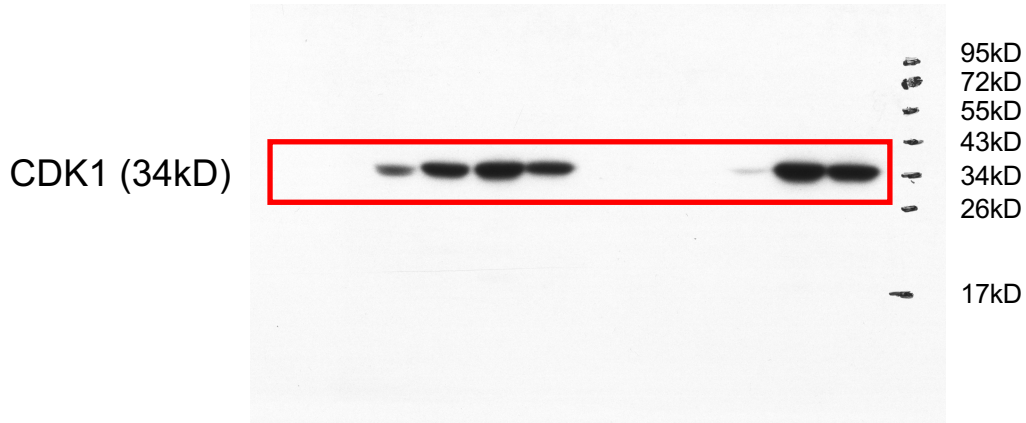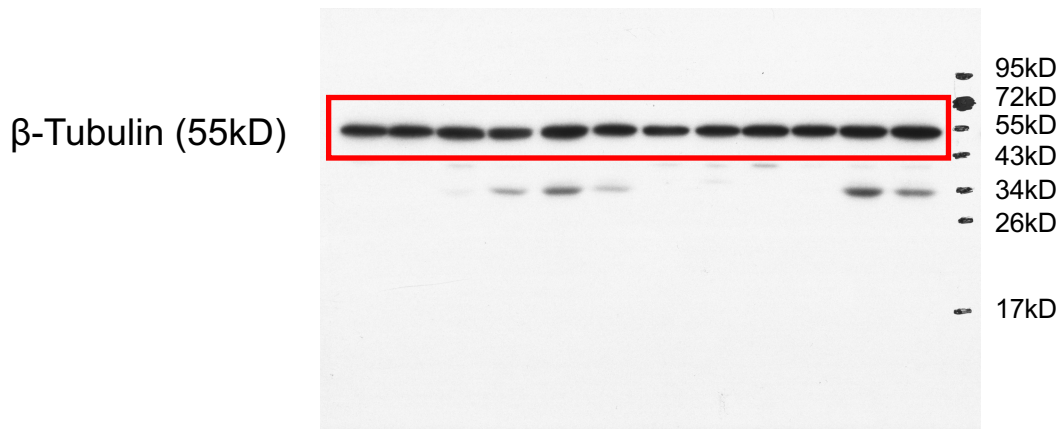

### Legend:

Areas of the gel shown in Figure 4A are marked in red.

The membrane was probed first with anti-CDK1 and subsequently with anti-Tubulin antibodies. Predicted molecular weights for CDK1 and  $\beta$ -tubulin are indicated.
